# Supplementary material for: Stereochemical effects on dynamics in two-component systems of gelators with perfluoroalkyl and alkyl chains as revealed by vibrational circular dichroism
Source: Royal Society of Chemistry journal article supplement (doi:10.1039/c7cp06264h), 2017-10-09
Supplement: c7cp06264h1.pdf [file c7cp06264h1.pdf]

## Supplementary Information

for

### Stereochemical Effects on Dynamics in Two-component Systems of Gelators with Perfluoroalkyl and Alkyl Chains as Revealed by Vibrational Circular Dichroism

Hisako Sato,<sup>a\*</sup> Tomoko Yajima,<sup>b</sup> and Akihiko Yamagishi<sup>c</sup>

<sup>a</sup>*Ehime University*, <sup>b</sup>*Ochanomizu University*, <sup>c</sup>*Toho University*

#### **Contents:**

- 1. Photos for gelation**
- 2. The time change of VCD spectra for a CD<sub>3</sub>CN gel containing an enantiomeric mixture of CF7 and CH7**
- 3. Sol-gel transition temperature for one- or two-component systems**

## 1. Photos for gelation

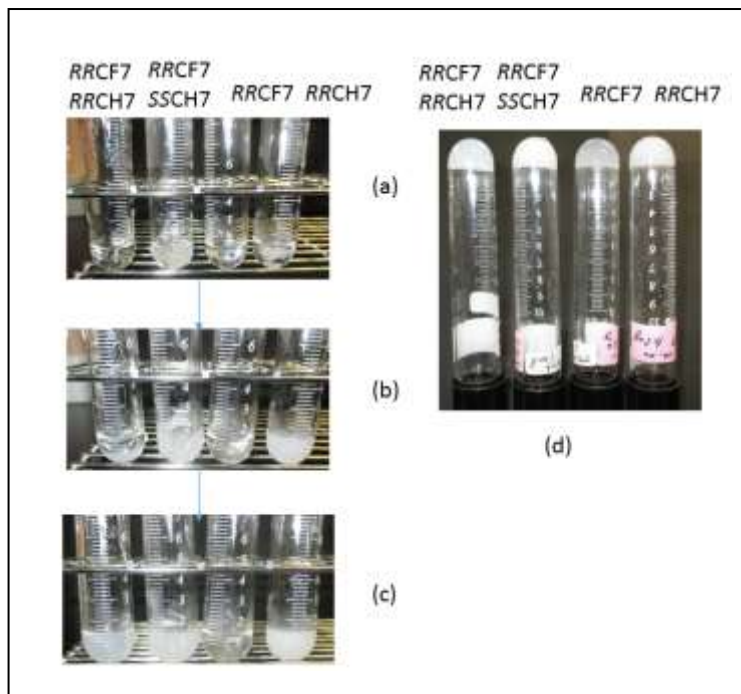

**Figure S1.** The photos were taken (a) immediately after dissolving gelators at 100 °C, (b) after one minutes, (c) after two minutes and (d) after attaining stable gel states, respectively. The photos of (b), (c) and (d) were taken at room temperature. A solvent was acetonitrile.

2. The time change of VCD spectra for a CD<sub>3</sub>CN gel containing an enantiomeric mixture of CF7 and CH7

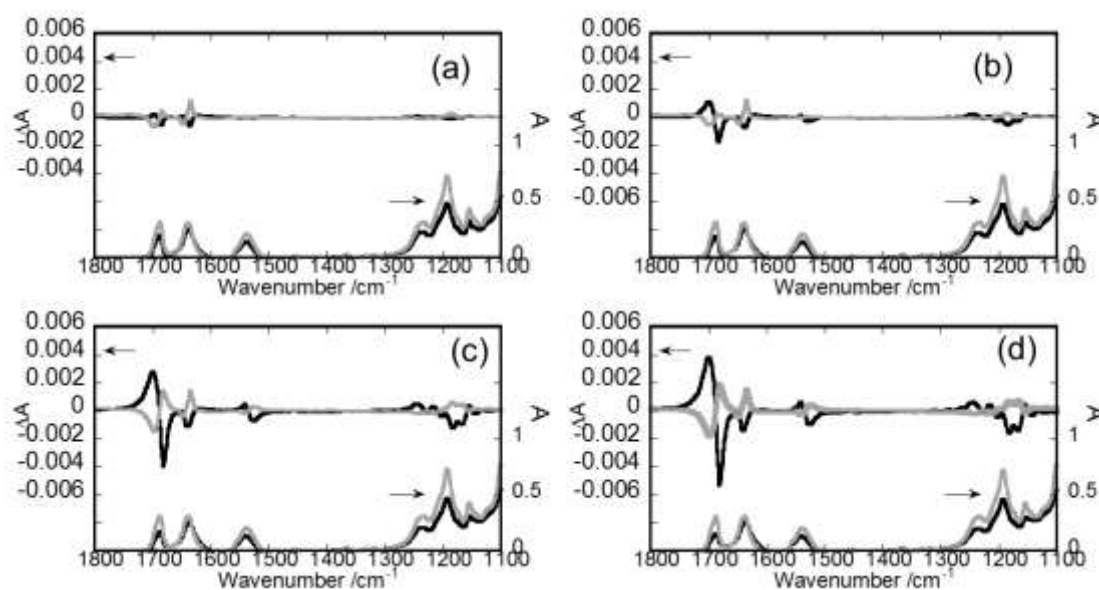

**Figure S2.** The VCD (upper) and IR (lower) spectra of the CD<sub>3</sub>CN gels containing *RR*-CF7/*RR*-CH7 (black solid line) or *SS*-CF7/*SS*-CH7 (grey line), respectively. The spectra were recorded at (a) 2 min, (b) 4 min, (c) 7 min and (d) 10 min after gelation. The initial and final spectra of the same samples were shown in the text (Figures 2 (a)-(c), respectively).

### 3. Sol-gel transition temperature for one- or two-component systems

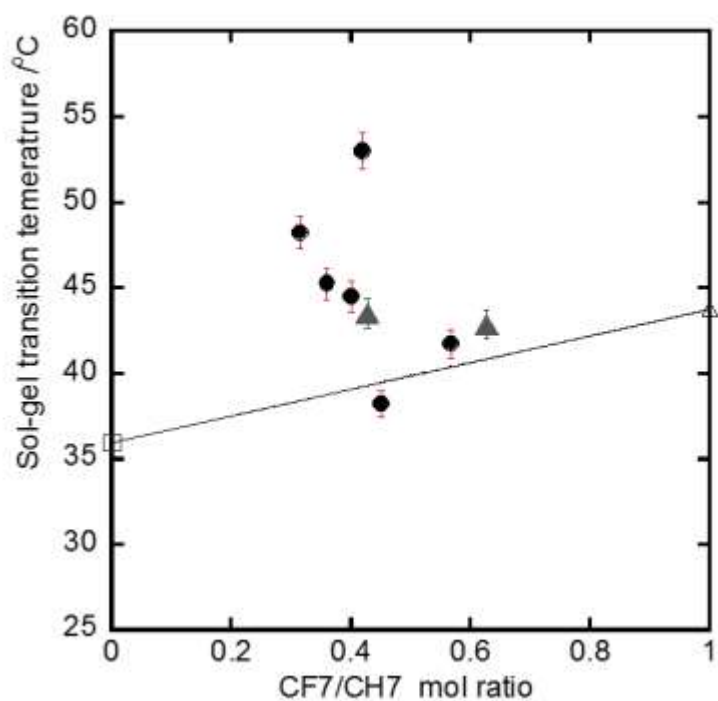

**Figure S3.** The plots of sol-gel transition temperature against the ratio of components for two-component systems. The data for one-component systems were also included: *RR-CF7/RR-CH7* (solid circle), *RR-CF7/SS-CH7* (solid triangle), *RR-CH7* (open square) and *RR-CF7* (open triangle), respectively. The concentration of gelators was 0.017M-0.05M for *RR-CF7/RR-CH7*, 0.025M-0.03M for *RR-CF7/SS-CH7*, 0.017M for *RR-CH7* and 0.010M for *RR-CF7*, respectively. A solvent was acetonitrile:
